# Supplementary material for: Engaging policy in science writing: Patterns and strategies
Source: PLoS One. 2019 Aug 1;14(8):e0220497. doi: 10.1371/journal.pone.0220497 (PMC6675390; doi:10.1371/journal.pone.0220497)
Supplement: S1 Table — (CSV) [file pone.0220497.s002.csv]

Timestamp	Coder	Article	citation info	Title	Year	Primary Author	Total number of authors	listed affiliations	Total number of affiliations	Authors with 1 or more affiliations	Authors law or policy departments	Authors government agencies	Government agencies represented	Authors NGO	Authors other policy organizations	Questions on authors and affiliations	AAAS journal category	Primary scientific sector	Other scientific sectors	Primary policy sector	Other policy sectors	Policy discussion depth	Actors	Actions	Number of references	Number of references to specific laws, bills, etc	Number of references to legal or policy journal	Number of references to policy books or reports	References coded in each category	Law citations	Science citations
8/30/2016 13:42	synthesis	10314	343: 30-31	Promoting Transparency in Social Science Research Social	2014	Miguel	19	11	20	1	6	0	0	1	1	0	Social Science	Social, Economic, and Political Sciences (Section K)	Societal Impacts of Science and Engineering (Section X)	Science, Technology and Innovation		None	None	None	18	1	3	1	2; 4, 9, 14; 1	0	400
8/30/2016 13:55	synthesis	10413	339: 36-37	Threats from India's Himalaya Dams	2013	Grumbine	2	2	2	0	0	0	0	0	0	0	Ecology	Agriculture, Food, and Renewable Resources (Section O)	Biological Sciences (Section G), Societal Impacts of Science and Engineering (Section X)	Environment and Sustainability	Cities, Urban and Regional Development, Energy, Transport and Infrastructure	Deep	General	Specific	25	2	1	3	1, 18; 8; 10, 17, 25	0	216
8/30/2016 14:00	synthesis	10612	335: 41-42	Guiding Limited Use of Chimpanzees in Research	2012	Altevogt	4	2	4	0	0	1	0	0	0	0	Research Agenda	Medical Sciences (Section N)	Biological Sciences (Section G), Pharmaceutical Sciences (Section S)	Science, Technology and Innovation	Health	Deep	Specific	Specific	8	3	0	2	3, 4, 6; -- ; 1, 8	0	80
8/30/2016 14:16	synthesis	10711	331: 34-35	Bad Science Used to Support Torture and Human Experimentation	2011	Iacopino	3	6	7	3	0	0	0	2	0	0	Ethics	Medical Sciences (Section N)	Psychology (Section J), Societal Impacts of Science and Engineering (Section X)	Defence, Security and Foreign Relations	Policing and Justice Administration	Deep	General	Specific	13	2	0	6	5, 9, 10, 15; --; 1, 2, 4, 11, 12, 14	2	5
8/30/2016 14:09	synthesis	10816	351: 128-129	Balancing hydropower and biodiversity in the Amazon, Congo, and Mekong	2016	Winemiller	40	31	40	0	0	1	Mekong River Commission Secretariat	5	1	0	Development and Environment	Agriculture, Food, and Renewable Resources (Section O)	Biological Sciences (Section G), Engineering (Section M)	Environment and Sustainability	Cities, Urban and Regional Development, Energy, Transport and Infrastructure	Deep	General	Specific	19	0	1	1	0; 15; 11	0	21
8/31/2016 11:52	synthesis	10915	347: 133-135	China's aquaculture and the world's wild fisheries	2015	Cao	7	7	9	2	0	0	0	0	0	0	Global Food Supply	Agriculture, Food, and Renewable Resources (Section O)	Biological Sciences (Section G)	Agriculture and Resources	Environment and Sustainability	Deep	General	Specific	28	0	1	2	0 ; 4 ; 2, 8,	0	82
8/31/2016 11:59	synthesis	11014	343: 140-141	Coping with Uncertainty in Space Science Planning	2014	Kennel	2	2	2	0	0	0	0	0	0	0	Space Science	Astronomy (Section D)	Physics (Section B)	Science, Technology and Innovation		Deep	Specific	General	1	0	0	0		0	0
8/31/2016 12:06	synthesis	11113	339: 144-145	Regulation of Online Social Network Studies	2013	Shapiro	2	4	4	1	1	0	0	0	0	0	Research Ethics	Societal Impacts of Science and Engineering (Section X)	Information, Computing, and Communication (Section T), Social, Economic, and Political Sciences (Section K)	Science, Technology and Innovation		Deep	Specific	Specific	19	5	1	0	2, 8, 11, 14, 16; 20; --	1	10
8/31/2016 12:19	synthesis	11615	347: 236-237	Disclosing patents' secrets	2015	Graham	2	2	2	0	0	0	0	0	0	0	Intellectual Property	Industrial Science and Technology (Section P)	Societal Impacts of Science and Engineering (Section X)	Science, Technology and Innovation	Industry, Trade and Investment	Deep	General	Specific	13	2	1	3	3, 5; 10; 2, 6, 8	2	2
8/31/2016 12:12	synthesis	11714	343: 252-253	Straining Emergency Rooms by Expanding Health Insurance	2014	Fisman	1	1	1	0	0	0	0	0	0	0	Health Care Policy	Medical Sciences (Section N)	Social, Economic, and Political Sciences (Section K)	Health		Shallow	None	None	9	0	0	0		0	0
9/5/2016 14:55	synthesis	11813	339: 275-276	The Complexities of Genomic Identifiability	2013	Rodriguez	4	2	4	0	0	1	NIH	0	0	0	Research Ethics	Biological Sciences (Section G)	Medical Sciences (Section N), Societal Impacts of Science and Engineering (Section X)	Science, Technology and Innovation	Health	Deep	General	Specific	22	0	2	2	0; 12, 20; 3, 21	3	530
9/5/2016 16:42	synthesis	12012	335: 289-290	What Next for Agriculture After Durban?	2012	Beddington	14	14	14	0	0	4	UK Government Chief Scientific Adviser, Royal Society, DFID (UK), Chinese Academy of Sciences, Ethiopian ATA, State Minister of Agriculture, UN Adivsor for Brazil, Vietnam Academy of Agricultural Science, Kenyan Cabinet, ACTS	0	0	0	Agriculture	Agriculture, Food, and Renewable Resources (Section O)	Atmospheric and Hydrospheric Sciences (Section W)	Agriculture and Resources	International Development, Environment and Sustainability	Deep	General	Specific	15	0	0	6	0; 0; 1, 5, 8, 10, 11, 14	0	947
9/5/2016 16:47	synthesis	12111	331: 287-288	Research Practice and Participant Preferences: The Growing Gulf	2011	Trinidad	6	3	6	0	0	0	0	0	0	0	Research Ethics	Medical Sciences (Section N)	Biological Sciences (Section G)	Health	Science, Technology and Innovation	Deep	General	Specific	33	5	0	0	3, 12, 13, 16, 17; 0; 14	3	515
9/5/2016 16:55	synthesis	12216	351: 337-339	Editing policy to fit the genome?	2016	Isasi	3	2	4	1	3	0	0	0	0	0	Genetic Technology Regulation	Medical Sciences (Section N)	Biological Sciences (Section G), Societal Impacts of Science and Engineering (Section X)	Health	Science, Technology and Innovation	Deep	General	Specific	23	9	1	2	4, 5, 6, 9, 10, 11, 12, 13, 20; 8; 21, 23	1	2
9/6/2016 10:10	synthesis	12315	347: 375-376	Smoke and fire over e-cigarettes	2015	Fairchild	2	1	2	0	0	0	0	0	0	0	Public Health	Medical Sciences (Section N)		Health		Deep	General	Specific	15	2	0	1	12, 14; 0; 9	1	9
9/6/2016 10:20	synthesis	12414	343: 373-374	Raw Personal Data: Providing Access	2014	Lunshof	3	3	4	1	0	0	0	0	0	0	Information Access	Medical Sciences (Section N)	Biological Sciences (Section G)	Health	Science, Technology and Innovation	Shallow	None	None	11	1	1	2	9; 6; 4, 8	3	64
9/6/2016 10:30	synthesis	12712	335:405	Mixed Messages on Prices and Food Security	2012	Swinnen	2	2	3	1	0	0	0	0	0	0	Global Food Supply	Agriculture, Food, and Renewable Resources (Section O)	Social, Economic, and Political Sciences (Section K)	Agriculture and Resources	International Development	Shallow	None	None	38	0	3	12	0; 3, 7, 16; 10, 13, 14, 15, 17, 19, 25, 33, 34, 36, 37, 39	0	332
9/6/2016 10:35	synthesis	12916	351:450	How can higher-yield farming help to spare nature?	2016	Phalan	10	5	12	0	0	0	0	0	0	0	Conservation Ecology	Agriculture, Food, and Renewable Resources (Section O)	Biological Sciences (Section G)	Agriculture and Resources	Environment and Sustainability	Deep	General	Specific	17	0	1	1	0; 12; 13	0	5
9/6/2016 10:41	synthesis	13015	347:479	Balancing privacy versus accuracy in research protocols	2015	Goroff	1	1	1	0	0	0	0	1	0	an author was in OSTP	Information Access	Information, Computing, and Communication (Section T)	Societal Impacts of Science and Engineering (Section X)	Science, Technology and Innovation	Privacy	Deep	Specific	General	16	1	1	0	17; 4; 0	0	0
9/7/2016 9:08	synthesis	13114	343:489	Drug Policy as Conservation Policy: Narco-Deforestation	2014	McSweeney	7	5	7	0	0	0	0	0	0	0	Conservation	Biological Sciences (Section G)	Social, Economic, and Political Sciences (Section K)	Policing and Justice Administration	Environment and Sustainability, Defence, Security and Foreign Relations	Shallow	None	None	18	0	0	4	0; 0; 2, 3, 4, 9	0	44
9/7/2016 9:14	synthesis	20113	339:526	Hurdles and Opportunities for Landscape-Scale Restoration	2013	Menz	3	2	5	2	0	2	Botanic Gardens Park and Authority (Australia)	0	0	0	Ecology	Biological Sciences (Section G)		Environment and Sustainability		Deep	Specific	General	38	0	0	2	0; 0; 25, 31	1	281
9/7/2016 9:18	synthesis	20312	335:542	Coercive Citation in Academic Publishing	2012	Wilhite	2	1	2	0	0	0	0	0	0	Eric A. Fong is a nationally recognized lawyer	Scientific Publications	General Interest in Science and Engineering (Section Y)		Science, Technology and Innovation	Education	None	None	None	7	0	0	0		0	477
9/7/2016 9:23	synthesis	20411	331:537	Better Science Needed for Restoration in the Gulf of Mexico	2011	Bjorndal	10	10	10	0	0	2	FL F&W Conservation Commission, NRC	0	0	0	Ecology	Biological Sciences (Section G)		Environment and Sustainability	Energy, Transport and Infrastructure	Deep	Specific	Specific	28	0	0	3	0; 0; 2, 6, 21	2	235
9/15/2016 11:17	synthesis	20516	351:564	Taking race out of human genetics	2016	Yudell	4	3	4	0	1	0	0	0	0	0	Science and Society	Biological Sciences (Section G)	Medical Sciences (Section N), Social, Economic, and Political Sciences (Section K)	Health	Science, Technology and Innovation	Deep	Specific	Specific	24	0	1	0	0; 24; 0	0	1
9/7/2016 9:30	synthesis	20615	347:606	Where is Silicon Valley?	2015	Guzman	2	2	3	1	2	1	NBER	0	0	0	Innovation Economics	Social, Economic, and Political Sciences (Section K)	Industrial Science and Technology (Section P), Societal Impacts of Science and Engineering (Section X)	Cities, Urban and Regional Development	Public Finance and Social Policy	None	None	None	16	0	1	0	0; 12; 0	0	489
9/7/2016 9:54	synthesis	21012	335:660	Adaptations of Avian Flu Virus Are a Cause for Concern	2012	Berns	22	22	22	0	0	0	0	1	0	0	Public Health and Biosecurity	Medical Sciences (Section N)	Biological Sciences (Section G), Societal Impacts of Science and Engineering (Section X)	Health	Science, Technology and Innovation, Defence, Security and Foreign Relations	Deep	General	Specific	8	0	0	0	0; 0; 1, 2, 3	1	253
9/7/2016 9:59	synthesis	21111	331:678	Measuring the Results of Science Investments	2011	Lane	2	2	2	0	0	1	NIH office of policy	0	1	NSF	Research Funding	Societal Impacts of Science and Engineering (Section X)		Science, Technology and Innovation		Deep	General	Specific	18	1	1	4	2; 12; 6, 8, 9, 15	1	201
9/7/2016 10:07	synthesis	21216	351:668	Finding an ethical path forward for mitochondrial replacement	2016	Claiborne	3	2	3	0	0	2	Institute of Medicine, National Academies, Washington	0	0	0	Ethics of New Technologies	Medical Sciences (Section N)	Biological Sciences (Section G)	Health	Science, Technology and Innovation	Deep	Specific	Specific	14	0	0	3	0; 0; 8, 13, 14	0	3
2/6/2017 9:14	synthesis	21315	347: 720	Randomize evaluations to improve health care delivery	2015	Finkelstein	2	3	4	1	0	1	NBER	0	0	0	Health Care Policy	Medical Sciences (Section N)		Health		Deep	General	Specific	13	0	1	2	0; 8; 1, 7	0	5
2/6/2017 9:35	synthesis	21414	343: 733	Methane Leaks from North American Natural Gas Systems	2014	Brandt	16	14	18	3	1	3	NOAA, Dept of State	1	0	NREL, Lawrence Berkeley National Lab	Energy and Environment	Industrial Science and Technology (Section P)	Atmospheric and Hydrospheric Sciences (Section W), Engineering (Section M)	Environment and Sustainability	Energy, Transport and Infrastructure	Deep	General	Specific	29	2	0	2	23, 24; 0; 22, 29	12	1330
2/6/2017 9:42	synthesis	21513	339: 761	Beyond Arms-Control Monitoring	2013	Jeanloz	4	4	5	1	0	0	0	0	0	Pacific NW Natl Lab	Arms Control	Atmospheric and Hydrospheric Sciences (Section W)	Engineering (Section M), Social, Economic, and Political Sciences (Section K)	Defence, Security and Foreign Relations	Environment and Sustainability, Science, Technology and Innovation	Deep	General	Specific	20	1	1	1	1; 11; 4	0	NA
2/6/2017 10:39	JB Ruhl	21916	351: 818	Complexity theory and financial regulation	2016	Battiston	10	14	14	3	0	0	0	0	0	0	Complex Systems	Information, Computing, and Communication (Section T)	Mathematics (Section A), Statistics (Section U)	Financial Markets	Macroeconomic Policy	None	None	None	17	0	1	0	AA 5	1	2
2/6/2017 10:45	JB Ruhl	22015	347: 830	Coping with earthquakes induced by fluid injection	2015	McGarr	12	7	12	0	0	8	USGS	0	1	Lots of USGS; Lawrence Berkeley National Lab	Geophysics	Geology and Geography (Section E)	Engineering (Section M), Physics (Section B)	Energy, Transport and Infrastructure	Environment and Sustainability	Deep	Specific	None	23	1	1	0	Z 23; AA 21	1	27
2/13/2017 9:10	JB Ruhl	22114	343: 972-73	A Better Route to Tech Standards	2014	Lerner	2	2	2	0	0	0	0	0	0	0	Intellectual Property	Industrial Science and Technology (Section P)	Societal Impacts of Science and Engineering (Section X)	Science, Technology and Innovation	Industry, Trade and Investment	Deep	Specific	Specific	6	1	2	3	Z 6; AA 2, 7; AB 3, 4, 5	2	75
2/13/2017 9:17	JB Ruhl	22213	339: 909-10	The Stability of Malaria Elimination	2013	Chiyaka	9	9	16	3	0	3	NIH	0	1	0	Infectious Disease	Medical Sciences (Section N)	Biological Sciences (Section G)	Health	Public Finance and Social Policy	Deep	General	Specific	25	0	0	2	AB 9, 22	0	344
2/13/2017 9:30	JB Ruhl	22412	335: 922-23	Preserving Montreal Protocol Climate Benefits by Limiting HFCs	2012	Velders	9	6	9	0	0	7	Netherlands National Institute for Public Health, NOAA, Swiss Federal Lab.UNEP	0	0	0	Climate Change	Atmospheric and Hydrospheric Sciences (Section W)	Industrial Science and Technology (Section P), Societal Impacts of Science and Engineering (Section X)	Environment and Sustainability	Science, Technology and Innovation	Deep	General	Specific	12	0	0	4	AB 1, 6, 14, 15	0	422
2/13/2017 9:42	JB Ruhl	22511	331: 1013-14	Linking Policy on Climate and Food	2011	Godfray	5	3	5	0	0	3	UK Govt Office for Science	0	0		Global Food Supply	Agriculture, Food, and Renewable Resources (Section O)	Atmospheric and Hydrospheric Sciences (Section W)	Agriculture and Resources	International Development, Environment and Sustainability	Deep	General	Specific	16	2	0	5	Z 7, 9; AB 3, 6, 14, 15, 17	0	578
2/13/2017 14:50	JB Ruhl	22616	351: 914-16	Saving freshwater from salts	2016	Canedo-Arguelles	23	19	25	2	0	2	EPA, Queensland Government	0	0	0	Water	Agriculture, Food, and Renewable Resources (Section O)	Agriculture, Food, and Renewable Resources (Section O), Engineering (Section M)	Environment and Sustainability	Cities, Urban and Regional Development, Agriculture and Resources	Deep	General	Specific	17	3	0	1	Z 5, 6, 8; AB 15	0	0
2/13/2017 15:42	JB Ruhl	22715	347: 953-54	Prediction, precaution, and policy under global change	2015	Schindler	2	2	2	0	0	0	0	0	0	0	Sustainability	Biological Sciences (Section G)	Information, Computing, and Communication (Section T)	Environment and Sustainability		Deep	General	Specific	25	0	1	1	AA 24; AB 21	1	79
2/13/2017 16:07	JB Ruhl	30113	339: 1036-37	A Framework for Decisions About Research with HPAI H5N1 Viruses	2013	Patterson	5	2	5	0	0	5	Dept HHS, NIH	0	0	0	Research Funding	Medical Sciences (Section N)	Biological Sciences (Section G)	Health	Defence, Security and Foreign Relations	Deep	General	Specific	14	3	0	1	Z 10, 12, 14; AB 11	0	125
2/14/2017 16:15	JB Ruhl	30212	335: 1045-47	Reconsidering the Consequences of Selective Fisheries	2012	Garcia	18	18	22	3	0	3	DFO Canada	0	5	0	Conservation	Agriculture, Food, and Renewable Resources (Section O)	Biological Sciences (Section G)	Environment and Sustainability	Agriculture and Resources, Industry, Trade and Investment	Deep	General	Specific	21	0	0	1	AB 13	0	1013
2/14/2017 16:20	JB Ruhl	30411	331: 1139-40	The Biodiversity and Ecosystem Services Science-Policy Interface	2011	Perrings	4	4	4	0	0	0	0	1	1	0	Ecology	Biological Sciences (Section G)	Agriculture, Food, and Renewable Resources (Section O)	Environment and Sustainability	Agriculture and Resources	None	None	None	23	2	0	3	Z 4, 5; AB 10, 13, 15	0	2823
2/14/2017 16:25	JB Ruhl	30416	351: 1024-26	Liberating field science samples and data	2016	McNutt	6	6	6	0	0	0	0	0	0	0	Research Integrity	General Interest in Science and Engineering (Section Y)		Science, Technology and Innovation		Shallow	None	None	10	0	0	0	0	0	1
2/14/2017 16:42	JB Ruhl	30615	347: 1075-76	Being smart about SMART environmental targets	2015	Maxwell	10	6	11	1	4	0	0	1	0	0	Environmental Science	General Interest in Science and Engineering (Section Y)	Atmospheric and Hydrospheric Sciences (Section W), Biological Sciences (Section G)	Environment and Sustainability		Shallow	None	None	15	2	0	0	Z 5, 7	0	22
2/14/2017 16:48	JB Ruhl	30813		Behavioral Economics and the Retirement Savings Crisis	2013	Benartzi	2	3	3	1	1	0	0	0	0	0	Economics	Psychology (Section J)	Social, Economic, and Political Sciences (Section K)	Financial Markets	Education, Employment, Labour and Immigration	Deep	General	Specific	16	0	0	3		5	67
2/14/2017 16:52	JB Ruhl	30912	335: 1173-74	Surveillance of Animal Influenza for Pandemic Preparedness	2012	Peiris	3	3	3	0	0	0	0	0	0	0	Public Health	Medical Sciences (Section N)	Agriculture, Food, and Renewable Resources (Section O), Biological Sciences (Section G)	Health	Environment and Sustainability, Agriculture and Resources	Shallow	None	None	29	0	0	0	0	0	317
2/14/2017 16:57	JB Ruhl	31116	351: 1148-50	Ending hide and seek at sea	2016	McCauley	9	5	9	0	0	0	0	1	0	0	Marine Governance	Agriculture, Food, and Renewable Resources (Section O)	Biological Sciences (Section G), Information, Computing, and Communication (Section T)	Environment and Sustainability	Agriculture and Resources, Defence, Security and Foreign Relations	Deep	Specific	Specific	14	2	2	0	Z 2, 8; AA 12, 13	0	4
2/14/2017 17:01	JB Ruhl	31315	347: 1206-07	Get the science right when paying for nature's services	2015	Naeem	46	40	46	0	3	2	USAID, EPA	8	3	0	Environment and Development	Agriculture, Food, and Renewable Resources (Section O)	Agriculture, Food, and Renewable Resources (Section O), Biological Sciences (Section G)	Environment and Sustainability	International Development, Agriculture and Resources	Deep	General	Specific	18	0	0	0	0	0	63
2/14/2017 17:18	JB Ruhl	31414	343: 1203-04	The Parable of Google Flu: Traps in Big Data Analysis	2014	Lazer	4	6	9	0	2	0	0	0	0	0	Big Data	Information, Computing, and Communication (Section T)	Social, Economic, and Political Sciences (Section K), Statistics (Section U)	Science, Technology and Innovation		Shallow	None	None	35	0	0	0	0	5	678
2/14/2017 17:25	JB Ruhl	31513	339: 1278-79	End the Deadlock on Governance of Geoengineering Research	2013	Parson	2	2	2	0	2	0	0	0	0	0	Science and Regulation	Atmospheric and Hydrospheric Sciences (Section W)	Engineering (Section M)	Science, Technology and Innovation	Environment and Sustainability, Defence, Security and Foreign Relations	Deep	General	Specific	18	2	1	3	Z 16, 17; AA 9; AB 1, 2, 12	6	90
2/14/2017 17:33	JB Ruhl	31612	335: 1306-07	Navigating the Anthropocene: Improving Earth System Governance	2012	Biermann	32	31	38	6	23	0	0	0	0	0	Science and Government	Biological Sciences (Section G)	Social, Economic, and Political Sciences (Section K)	Environment and Sustainability	Defence, Security and Foreign Relations	Deep	General	Specific	19	0	4	3	AA 9, 12, 17, 18; AB 11, 13, 14	4	743
2/14/2017 17:40	JB Ruhl	31811	331: 1390-91	An Emerging Role of Zoos to Conserve Biodiversity	2011	Conde	5	2	5	0	0	0	0	0	0	0	Conservation	Biological Sciences (Section G)		Environment and Sustainability	Arts and Culture	Shallow	None	None	23	2	0	1	Z 2, 3; AB 23	0	187
2/14/2017 17:45	JB Ruhl	31816	351: 1258-60	Reboot Gitmo for U.S.-Cuba research diplomacy	2016	Roman	2	2	2	0	1	0	0	0	0	Naval War College	Science Diplomacy	Biological Sciences (Section G)	Social, Economic, and Political Sciences (Section K)	Environment and Sustainability	International Development, Defence, Security and Foreign Relations	Deep	Specific	Specific	15	0	0	1	AB 12	0	0
2/14/2017 17:49	JB Ruhl	32015	347: 1317-19	Creating a safe operating space for iconic ecosystems	2015	Scheffer	13	10	13	0	1	0	0	0	0	0	Climate and Conservation	Biological Sciences (Section G)	Agriculture, Food, and Renewable Resources (Section O)	Environment and Sustainability		Shallow	None	None	21	0	0	0	0	1	200
2/14/2017 14:52	JB Ruhl	32213	339: 1386-87	Drug Patents at the Supreme Court Arguments	2013	Hemphill	2	2	2	0	2	0	0	0	0	0	Intellectual Property	Pharmaceutical Sciences (Section S)	Industrial Science and Technology (Section P), Medical Sciences (Section N)	Science, Technology and Innovation	Health	Deep	Specific	Specific	16	2	4	5	Z 1, 21; AA 4, 10, 14, 20; AB 6, 9, 11, 13, 19	0	14
2/14/2017 14:41	JB Ruhl	32511	331: 1521-22	Marine Biodiversity and Gene Patents	2011	Arnaud-Haond	3	3	4	1	0	0	0	0	0	0	Global Genetics Resources	Geology and Geography (Section E)	Industrial Science and Technology (Section P)	Science, Technology and Innovation	International Development, Industry, Trade and Investment	Deep	Specific	Specific	23	1	4	2	Z 1; AA 5, 6, 17, 18; AB 3, 21	2	196
2/14/2017 14:32	JB Ruhl	32715	347: 1420-22	Do biofuel policies seek to cut emissions by cutting food?	2015	Searchinger	5	4	5	0	1	0	0	0	2	0	Environmental Economics	Agriculture, Food, and Renewable Resources (Section O)	Societal Impacts of Science and Engineering (Section X)	Agriculture and Resources	Environment and Sustainability	Deep	General	Specific	21	1	0	8	Z 11; AB 2, 3, 4, 5, 8, 10, 14, 17	1	19
2/14/2017 14:03	JB Ruhl	32814	343: 1436-37	Next Steps for Citizen Science	2014	Bonney	7	5	8	1	0	1	NPS	0	0	0	Citizen Science	General Interest in Science and Engineering (Section Y)	Societal Impacts of Science and Engineering (Section X)	Education	Science, Technology and Innovation	Deep	General	Specific	13	0	0	0	0	0	269
2/14/2017 13:57	JB Ruhl	32913	339: 1526-27	Measuring China's Circular Economy	2013	Geng	4	5	5	1	0	0	0	0	0	0	Environment and Development	Agriculture, Food, and Renewable Resources (Section O)	Biological Sciences (Section G)	Environment and Sustainability	Agriculture and Resources, Energy, Transport and Infrastructure	Deep	General	Specific	19	1	0	3	Z 1; AB 2, 3, 13	0	233
2/14/2017 13:51	JB Ruhl	33012	335: 1576-77	To Protect Human Subjects, Review What Was Done, Not Proposed	2012	Klitzman	2	2	2	0	0	0	0	0	0	0	Research Ethics	Societal Impacts of Science and Engineering (Section X)	Medical Sciences (Section N), Social, Economic, and Political Sciences (Section K)	Health	Science, Technology and Innovation	Deep	Specific	Specific	22	2	3	2	Z 1, 2; AA 7, 12, 15; AB 5, 21	2	27
2/13/2017 19:36	JB Ruhl	40111	332: 41-42	Economic Importance of Bats in Agriculture	2011	Boyles	4	4	4	0	0	1	USGS	0	0	0	Conservation	Biological Sciences (Section G)	Agriculture, Food, and Renewable Resources (Section O), Engineering (Section M)	Environment and Sustainability	Energy, Transport and Infrastructure	Shallow	None	None	25	0	0	0	0	1	1981
2/13/2017 19:44	JB Ruhl	40315	348: 46-47	Ebola and beyond	2015	Lipsitch	7	9	9	2	0	0	0	0	0	0	Vaccine Testing	Medical Sciences (Section N)		Health	International Development	Deep	General	Specific	16	0	1	0	AA 8	0	11
2/13/2017 19:51	JB Ruhl	40414	344: 41-43	Science Funding and Short-Term Economic Activity	2014	Weinberg	7	11	12	2	1	1	NBER	1	0	0	Research Funding	General Interest in Science and Engineering (Section Y)		Public Finance and Social Policy	Education	Shallow	None	None	10	0	1	0	AA 10	0	28
2/13/2017 19:59	JB Ruhl	40513	340: 32-33	What If Extinction Is Not Forever?	2013	Sherkow	2	2	2	0	2	0	0	0	0	0	Genomics	Biological Sciences (Section G)	Social, Economic, and Political Sciences (Section K), Societal Impacts of Science and Engineering (Section X)	Science, Technology and Innovation	Environment and Sustainability	Deep	General	Specific	14	3	0	0	Z 8, 11, 13	3	169
2/13/2017 20:07	JB Ruhl	40612	336: 38-39	Improving Asia-Pacific Science Collaboration	2012	Toope	3	4	4	1	1	0	0	0	0	0	Science in Asia	Education (Section Q)	General Interest in Science and Engineering (Section Y), Societal Impacts of Science and Engineering (Section X)	Education	Industry, Trade and Investment	Shallow	None	None	9	0	0	0	0	0	3
2/13/2017 20:14	JB Ruhl	40811	332: 178-79	Mekong Hydropower Development	2011	Grumbine	2	2	2	0	0	0	0	0	0	0	Environment and Development	Agriculture, Food, and Renewable Resources (Section O)	Societal Impacts of Science and Engineering (Section X)	Environment and Sustainability	International Development	Deep	Specific	Specific	18	0	0	3	AB 2, 10, 11	0	740
2/13/2017 20:24	JB Ruhl	41015	348: 178-80	Transatlantic lessons in regulation of mitochondrial replacement therapy	2015	Cohen	3	3	3	0	1	0	0	0	0	0	Medicine	Medical Sciences (Section N)	Societal Impacts of Science and Engineering (Section X)	Health	Science, Technology and Innovation	Deep	Specific	Specific	19	7	0	3	Z 5, 8, 9, 10, 11, 12, 13; AB 7, 15	1	4
2/13/2017 20:46	JB Ruhl	41213	340: 147-48	Right-Sizing Stem-Rust Research	2013	Pardey	9	8	18	4	5	0	0	0	0	0	Agriculture	Agriculture, Food, and Renewable Resources (Section O)		Agriculture and Resources		Shallow	None	None	16	0	0	0	0	0	285
2/13/2017 20:55	JB Ruhl	41312	336: 159-60	Shining Light into Black Boxes Funders	2012	Morin	7	6	7	0	1	0	0	0	0	0	Research Priorities	Information, Computing, and Communication (Section T)	General Interest in Science and Engineering (Section Y), Societal Impacts of Science and Engineering (Section X)	Science, Technology and Innovation		Deep	General	Specific	36	1	2	0	Z 27; AA 1, 13	0	642
2/13/2017 21:02	JB Ruhl	41511	332: 309-10	Genomics, Biobanks, and the Trade-Secret Model Robert	2011	Mitchell	6	2	6	0	6	0	0	0	0	0	Genomics	Medical Sciences (Section N)	Societal Impacts of Science and Engineering (Section X)	Health	Science, Technology and Innovation	Deep	Specific	Specific	18	4	1	0	Z 9, 12, 17, 18; AA 7	0	117
2/14/2017 8:24	JB Ruhl	41715	348: 291-92	Improve customs systems to monitor global wildlife trade	2015	Chan	4	1	4	0	0	0	0	0	0	0	Conservation	Biological Sciences (Section G)		Industry, Trade and Investment	Environment and Sustainability	Deep	Specific	Specific	14	2	0	3	Z 10, 13; AB 1, 12, 14	0	16
2/14/2017 8:33	JB Ruhl	41814	344: 257-59	Particulate Matter Matters	2014	Dominici	3	4	4	1	1	1	NBER	0	0	0	Science and Regulation	Atmospheric and Hydrospheric Sciences (Section W)	Social, Economic, and Political Sciences (Section K), Statistics (Section U)	Health	Environment and Sustainability	Deep	General	Specific	34	0	0	2	AB 1, 3	1	97
2/14/2017 8:41	JB Ruhl	42012	336: 299-300	FDA's Approach to Regulation of Products of Nanotechnology	2012	Hamburg	1	1	1	0	0	1	FDA	0	0	0	Science and Regulation	Engineering (Section M)	Societal Impacts of Science and Engineering (Section X)	Health	Environment and Sustainability, Science, Technology and Innovation	Deep	Specific	Specific	21	9	0	7	Z 8, 10, 14, 15, 16, 17, 18, 21, 22; AB 2, 3, 4, 9, 12, 13, 19	4	565
2/14/2017 8:49	JB Ruhl	42211	332: 424-25	Restoration Seed Banks' A Matter of Scale	2011	Merritt	2	2	4	0	0	0	0	0	0	0	Conservation	Agriculture, Food, and Renewable Resources (Section O)	Biological Sciences (Section G)	Agriculture and Resources	International Development, Environment and Sustainability	Deep	General	Specific	32	0	0	3	AB 1, 5, 6	0	320
2/14/2017 8:56	JB Ruhl	42415	348: 401-02	Ecosystem services lost to oil and gas in North America	2015	Allred	7	5	8	1	0	0	0	0	0	0	Sustainability	Agriculture, Food, and Renewable Resources (Section O)	Biological Sciences (Section G), Engineering (Section M)	Environment and Sustainability	Industry, Trade and Investment, Energy, Transport and Infrastructure	Shallow	None	None	22	1	0	2	Z 19; AB 18, 21	0	8
2/14/2017 9:01	JB Ruhl	42514	344: 363-64	Cracking Brazil's Forest Code	2014	Soares-Filho	8	4	9	1	0	1	Brazilian Government	0	0	0	Land Use	Agriculture, Food, and Renewable Resources (Section O)	Biological Sciences (Section G)	Agriculture and Resources	International Development, Environment and Sustainability	Deep	Specific	Specific	11	1	0	0	Z 2	2	588
2/13/2017 14:43	JB Ruhl	42613	340: 434-35	Human Subjects Protection and Research on Terrorism and Conflict	2013	Jackson	3	3	3	0	1	0	0	2	0	Cooley LLP law firm	Science and Law	Information, Computing, and Communication (Section T)	Societal Impacts of Science and Engineering (Section X)	Defence, Security and Foreign Relations		Deep	General	Specific	12	2	0	1	Z 2, 8; AB 7	0	NA
2/13/2017 14:19	JB Ruhl	42712	336: 418-19	Monitoring EU Emerging Infectious Disease Risk Due to Climate Change	2012	Lindgren	5	3	5	0	0	0	0	0	3	0	Public Health	Medical Sciences (Section N)	Information, Computing, and Communication (Section T)	Health	Public Finance and Social Policy, Environment and Sustainability	Deep	General	Specific	14	1	0	1	Z 8; AB 9	0	408
2/13/2017 14:14	Stephen Posner	42911	332: 540-41	Ethical Framework for Biofuels	2011	Buyx	2	3	3	0	0	0	0	1	0	0	Ethics	Agriculture, Food, and Renewable Resources (Section O)	Industrial Science and Technology (Section P)	Agriculture and Resources	International Development, Environment and Sustainability	Deep	General	Specific	23	5	1	8	Z 1, 2, 13, 17, 23; AA 10; AB 5, 7, 8, 11, 12, 14, 15, 16	0	420
2/15/2017 8:47	JB Ruhl	50115	348: 504-06	Secure sustainable seafood from developing countries	2015	Sampson	11	10	12	1	3	0	0	4	0	0	Sustainability	Agriculture, Food, and Renewable Resources (Section O)	Biological Sciences (Section G)	Agriculture and Resources	Environment and Sustainability, Industry, Trade and Investment	Deep	General	Specific	22	0	6	2	AA 3, 6, 10, 12, 18, 20; AB 13, 22	0	17
2/13/2017 11:33	JB Ruhl	50214	344: 473-75	Evaluating Flood Resilience Strategies for Coastal Megacities	2014	Aerts	6	4	6	0	0	0	0	0	0	0	Climate Adaptation	Engineering (Section M)	Industrial Science and Technology (Section P)	Cities, Urban and Regional Development	Environment and Sustainability	Deep	Specific	Specific	26	1	0	2	Z 9; AB 16, 19	1	128
2/13/2017 11:26	JB Ruhl	50412	336: 544-45	Rethinking Research Ethics: The Case of Postmarketing Trials	2012	London	3	2	3	1	0	0	0	0	0	0	Research Ethics	Medical Sciences (Section N)	Pharmaceutical Sciences (Section S)	Health		Deep	General	Specific	18	4	1	1	Z 1, 2, 3, 4; AA 16; AB 5	2	55
2/13/2017 11:18	JB Ruhl	50611	332: 670-71	Transforming U.S. Agriculture	2011	Reganold	15	14	15	0	0	0	0	0	0	0	Agriculture	Agriculture, Food, and Renewable Resources (Section O)		Agriculture and Resources	Public Finance and Social Policy, Environment and Sustainability	Deep	General	Specific	16	1	0	4	Z 7; AB 1, 3, 8, 10	0	616
2/13/2017 11:11	JB Ruhl	51013	340: 687-88	The NIH BRAIN Initiative	2013	Insel	3	3	3	0	0	3	NIH	0	0	0	Research Priorities	Neuroscience (Section V)	Medical Sciences (Section N), Societal Impacts of Science and Engineering (Section X)	Health		None	None	None	15	1	0	0	Z 1	0	459
2/13/2017 11:05	JB Ruhl	51112	336: 673-74	ELSI 2.0 for Genomics and Society	2012	Kaye	14	14	14	0	3	0	0	0	0	0	Research Priorities	Medical Sciences (Section N)	Information, Computing, and Communication (Section T)	Health	Education, Science, Technology and Innovation	None	None	None	16	0	4	0	AA 2, 3, 4, 12	0	65
2/13/2017 10:59	JB Ruhl	51311	332: 795-96	Toward the Second Commitment Period of the Kyoto Protocol	2011	Weaver	1	1	1	0	0	0	0	0	0	0	Climate Change	Atmospheric and Hydrospheric Sciences (Section W)	Societal Impacts of Science and Engineering (Section X)	Environment and Sustainability		Deep	General	Specific	14	0	0	1	AB 9	0	181
2/13/2017 10:28	JB Ruhl	51515	348: 858-60	Debating a testosterone "sex gap"�	2015	Karkazis	2	2	2	0	0	0	0	0	0	0	Science and Society	Medical Sciences (Section N)	Societal Impacts of Science and Engineering (Section X)	Health	Arts and Culture, Sports	Deep	Specific	Specific	20	2	0	1	Z 1, 3; AB 20	0	2
2/13/2017 10:19	JB Ruhl	51614	344: 696-98	A Call for Deep-Ocean Stewardship	2014	Mengerink	13	12	14	1	0	0	0	1	1	0	Oceans	Atmospheric and Hydrospheric Sciences (Section W)	Agriculture, Food, and Renewable Resources (Section O), Geology and Geography (Section E)	Environment and Sustainability	Agriculture and Resources, Industry, Trade and Investment	Deep	General	Specific	19	3	4	1	Z 13, 16, 18; AA 8, 11, 12, 14; AB 17	0	187
2/13/2017 10:09	JB Ruhl	51713	340: 814-15	Troubling Trends in Scientific Software Use	2013	Joppa	8	3	9	1	0	0	0	0	0	0	Computational Science	Information, Computing, and Communication (Section T)		Science, Technology and Innovation	Education	None	None	None	27	0	0	0	0	0	233
2/13/2017 9:50	JB Ruhl	51812	336: 805-08	Parochialism as a Central Challenge in Counterinsurgency Nicholas	2012	Sambanis	3	3	3	0	2	0	0	0	0	0	Social Psychology	Psychology (Section J)	Social, Economic, and Political Sciences (Section K)	Defence, Security and Foreign Relations		Deep	General	Specific	45	1	0	2	Z 27; AB 32, 37	0	57
2/6/2017 10:50	JB Ruhl	52314	344: 809	"Undemocracy": inequalities in science	2014	Xie	1	1	1	0	0	0	0	0	0	0	Sociology of Science	General Interest in Science and Engineering (Section Y)		Education	Employment, Labour and Immigration	None	None	None	20	0	0	0		0	32
2/6/2017 9:26	JB Ruhl	52413	340: 927	Economic Rewards to Motivate Blood Donations	2013	Lacetera	3	4	5	2	0	0	0	0	0	0	Public Health	Medical Sciences (Section N)	Social, Economic, and Political Sciences (Section K)	Health	Public Finance and Social Policy	Deep	Specific	Specific	35	2	4	5	Z 32, 33; AA 4, 5, 11, 20; AB 1, 16, 22, 23, 28	2	47
2/1/2017 11:01	Taylor Ricketts	52512	336:982	From "Science in Europe" to "European Science"�	2012	Nedeva	2	3	3	1	1	0	0	0	0	0	Science Policy	General Interest in Science and Engineering (Section Y)	Societal Impacts of Science and Engineering (Section X)	Science, Technology and Innovation	Defence, Security and Foreign Relations	Deep	Specific	Specific	26	1	5	4	law: 8, journal: 3,6,7,11,19, report: 4, 11, 16, 17,	0	NA
2/1/2017 11:12	Taylor Ricketts	52711	332:1036	Mitigating Local Causes of Ocean Acidification with Existing Laws	2011	Kelly	7	5	7	0	2	2	EPA, NOAA	0	0	0	Oceans	Atmospheric and Hydrospheric Sciences (Section W)	Biological Sciences (Section G)	Environment and Sustainability	Cities, Urban and Regional Development, Agriculture and Resources	Deep	Specific	Specific	28	5	0	4	law: 21,22,23,29,30 journal: report: 19,20, 24,25	4	930
2/1/2017 11:27	Taylor Ricketts	52915	348:964	Congress's attacks on science-based rules	2015	Rosenberg	15	7	15	0	2	0	0	10	0	0	Science and Regulation	General Interest in Science and Engineering (Section Y)	Societal Impacts of Science and Engineering (Section X)	Science, Technology and Innovation	Public Finance and Social Policy, Environment and Sustainability	Deep	Specific	Specific	9	0	0	7	law: journal: report: 2,3,4,5,6,7,9	0	0
2/1/2017 11:39	Taylor Ricketts	53113	340:1047	Ethics and Genomic Incidental Findings	2013	McGuire	9	7	9	0	4	0	0	0	0	0	Point-Counterpoint	Medical Sciences (Section N)	Biological Sciences (Section G)	Health	Science, Technology and Innovation	Shallow	None	None	11	0	0	1	law: journal: report: 10	8	609
2/1/2017 11:47	Taylor Ricketts	60112	336:1110	The Ultimate Genetic Test	2012	Drmanac	1	1	1	0	0	0	0	0	0	0	Medicine	Medical Sciences (Section N)	Biological Sciences (Section G), Societal Impacts of Science and Engineering (Section X)	Health	Science, Technology and Innovation	Shallow	None	None	29	0	0	0	law: journal: report:	0	258
2/1/2017 21:37	Taylor Ricketts	60311	332:1154	Research Principles for Developing Country Food Value Chains	2011	Gomez	20	11	20	0	0	0	0	0	0	0	Agriculture	Agriculture, Food, and Renewable Resources (Section O)		Agriculture and Resources	Industry, Trade and Investment	None	None	None	20	0	4	0	law: journal: 4,6,9,11, report:	0	230
2/1/2017 21:49	Taylor Ricketts	60515	348:1096	Challenges of a lowered U.S. ozone standard	2015	Cooper	4	2	6	2	0	4	NOAA	0	0	0	Atmosphere	Atmospheric and Hydrospheric Sciences (Section W)	Medical Sciences (Section N)	Health	Environment and Sustainability	Deep	Specific	General	15	1	0	2	law: 2, journal: report: 1,3	0	29
2/1/2017 22:00	Taylor Ricketts	60614	344:1090	EU agricultural reform fails on biodiversity	2014	Pe'er	21	21	28	7	2	0	0	0	0	0	Agricultural Policy	Agriculture, Food, and Renewable Resources (Section O)	Biological Sciences (Section G)	Agriculture and Resources	Environment and Sustainability	Deep	Specific	Specific	15	2	0	2	law: 7,8, journal: report: 2,6,	0	199
2/1/2017 22:13	Taylor Ricketts	60713	340:1172	Uncapping Conflict of Interest?	2013	Wood	2	2	2	0	2	0	0	0	0	0	Science and Regulation	Medical Sciences (Section N)	Agriculture, Food, and Renewable Resources (Section O), Societal Impacts of Science and Engineering (Section X)	Health	Environment and Sustainability, Agriculture and Resources	Deep	Specific	Specific	24	2	0	7	law: 1,2, journal: report: 3,4,11,13,16,19,25	2	3
2/1/2017 22:23	Taylor Ricketts	60812	336:1234	Water Resources Management: What Should Be Integrated?	2012	Hering	2	4	5	2	1	0	0	0	0	0	Water Management	Agriculture, Food, and Renewable Resources (Section O)	Atmospheric and Hydrospheric Sciences (Section W)	Environment and Sustainability	Agriculture and Resources	Shallow	None	None	29	0	0	3	law: journal: report: 3,4,5,	0	288
2/2/2017 9:20	Taylor Ricketts	61314	334:1230	Measuring the path toward malaria elimination	2014	Churcher	6	5	9	3	0	1	National Malaria Control Program of Swaziland	0	0	0	Public Health	Medical Sciences (Section N)	Biological Sciences (Section G)	Health		None	None	None	9	0	0	0	law: jurnal: report:	0	56
2/2/2017 9:30	Taylor Ricketts	61413	340:1291	A Human Right to Science	2013	Chapman	2	2	2	0	0	0	0	1	0	0	Human Rights	General Interest in Science and Engineering (Section Y)		Public Finance and Social Policy	International Development	Shallow	None	None	12	1	0	1	law: 7, journal: report: 9	0	20
2/2/2017 9:45	Taylor Ricketts	61512	336:1383	Avoiding Empty Ocean Commitments at Rio+20	2012	Veitch	8	6	8	0	0	0	0	1	0	0	Oceans	Agriculture, Food, and Renewable Resources (Section O)	Biological Sciences (Section G)	Environment and Sustainability	Agriculture and Resources	Shallow	None	None	53	2	4	6	law: 1,26, journal: 13,16,25,34, report: 29,47,48,51,53,55	0	376
2/2/2017 9:56	Taylor Ricketts	61711	332:1384	Solving the Sisyphean Problem of Malaria in Zanzibar	2011	Smith	7	6	9	2	0	2	Ministry of Health of Zanzibar, Tanzania	0	0	0	Infectious Disease	Medical Sciences (Section N)	Biological Sciences (Section G)	Health	Public Finance and Social Policy	Shallow	None	None	15	0	0	1	law: journal: report: 14	0	403
2/2/2017 10:09	Taylor Ricketts	61915	348:1320	After the Iran deal: Multinational enrichment	2015	Glaser	3	3	3	0	3	0	0	0	0	0	Nuclear Security	Physics (Section B)	Societal Impacts of Science and Engineering (Section X)	Defence, Security and Foreign Relations		Shallow	None	None	13	1	0	3	law:3, journal: report: 4,6,15	0	1
2/2/2017 10:27	Taylor Ricketts	62014	344:1346	Enabling the genomic revolution in Africa	2014	H3Africa Consortium	1	1	1	0	0	0	0	1	0	H3Africa Consortium	Research Capacity	Medical Sciences (Section N)	Biological Sciences (Section G)	Health	International Development, Science, Technology and Innovation	None	None	None	11	0	0	0		1	228
2/2/2017 10:38	Taylor Ricketts	62113	340:1410	Targeting Transparency	2013	Weil	3	2	3	0	2	0	0	0	0	0	Science and Regulation	Social, Economic, and Political Sciences (Section K)	Societal Impacts of Science and Engineering (Section X)	Industry, Trade and Investment	Public Finance and Social Policy	Shallow	None	None	20	3	2	1	Law: 1,2,15 journal:11,17, report: 12,	2	22
2/2/2017 10:53	Taylor Ricketts	62615	348:1420	Self-correction in science at work	2015	Alberts	13	14	14	1	1	2	NAS	1	0	0	Scientific Integrity	General Interest in Science and Engineering (Section Y)	Societal Impacts of Science and Engineering (Section X)	Science, Technology and Innovation		Shallow	None	None	14	0	0	2	law: journal: report: 9, 14	1	35
2/5/2017 17:27	Taylor Ricketts	62813	340:1527	The Global Prevalence of Intimate Partner Violence Against Women	2013	Devries	14	5	14	0	0	2	WHO	0	0	0	Global Health	Social, Economic, and Political Sciences (Section K)	Medical Sciences (Section N)	Health	Public Finance and Social Policy	Shallow	None	None	15	0	0	2	law: journal: report: 10, 15	3	844
2/5/2017 17:34	Taylor Ricketts	70111	13.90416667	Turning the Tide Against HIV Robin	2011	Shattock	4	5	6	2	0	1	UN	1	0	0	AIDS	Medical Sciences (Section N)	Biological Sciences (Section G), Pharmaceutical Sciences (Section S)	Health	Public Finance and Social Policy	None	None	None	18	0	0	1	law: journal: report: 1,	0	586
2/5/2017 17:41	Taylor Ricketts	70315	14.56736111	Ten things we have to do to individual patients from the recent rapid advances in biology and high-throughput achieve precision medicine	2015	Kohane	1	1	1	0	0	0	0	0	0	0	Health Care Policy	Medical Sciences (Section N)	Biological Sciences (Section G), Information, Computing, and Communication (Section T)	Health	Science, Technology and Innovation	Shallow	None	None	18	0	0	2	Law: journal: report: 1,2,	0	22
2/5/2017 17:56	Taylor Ricketts	70513	14.23125	Sustainable Intensification in Agriculture: Premises and Policies	2013	Garnett	17	12	17	0	2	2	FAO at the UN	3	0	0	Agriculture	Agriculture, Food, and Renewable Resources (Section O)	Atmospheric and Hydrospheric Sciences (Section W), Biological Sciences (Section G)	Agriculture and Resources	Health, Environment and Sustainability	None	None	None	17	0	0	4	law: journal: report: 1,6,10,16,	0	1109
2/5/2017 18:06	Taylor Ricketts	70612	14.06736111	Paying Patients for Their Tissue: The Legacy of Henrietta Lacks	2012	Truog	3	3	3	0	0	0	0	0	0	0	Research Ethics	Social, Economic, and Political Sciences (Section K)	Medical Sciences (Section N), Societal Impacts of Science and Engineering (Section X)	Health		None	None	None	7	1	0	0	law: 2, journal: report:	1	16
2/5/2017 18:24	Taylor Ricketts	70811	333:161	A Dark Age for Space Astronomy?	2011	Bonnet	2	3	3	1	0	0	0	0	0	0	Astrophysics	Astronomy (Section D)	Engineering (Section M), Industrial Science and Technology (Section P)	Science, Technology and Innovation		Deep	Specific	Specific	11	0	0	4	law: journal: report: 1,3,4,5,	0	4
2/5/2017 18:37	Taylor Ricketts	71015	349:144	Managing mining of the deep seabed	2015	Wedding	11	11	15	4	5	0	0	1	0	0	Oceans	Industrial Science and Technology (Section P)	Biological Sciences (Section G), Geology and Geography (Section E)	Energy, Transport and Infrastructure	Environment and Sustainability, Defence, Security and Foreign Relations	Deep	Specific	Specific	15	2	2	1	law:14,15 journal:1,13 report: 2	0	15
2/6/2017 9:52	Taylor Ricketts	71213	341:133	Revising China's Environmental Law	2013	He	5	4	7	2	3	0	0	0	0	0	Science and Law	Agriculture, Food, and Renewable Resources (Section O)	Atmospheric and Hydrospheric Sciences (Section W), Biological Sciences (Section G), Social, Economic, and Political Sciences (Section K)	Environment and Sustainability	Public Finance and Social Policy, Agriculture and Resources	Deep	Specific	Specific	18	2	2	5	law: 9,10, journal: 2,11, report: 1,2,4,12,15	3	133
2/6/2017 10:03	Taylor Ricketts	71312	337:158	Challenges to the Future Conservation of the Antarctic	2012	Chown	26	22	29	3	1	5	AAD, the commission	2	0	0	Conservation	Biological Sciences (Section G)	Atmospheric and Hydrospheric Sciences (Section W)	Environment and Sustainability	Industry, Trade and Investment	Shallow	None	None	18	1	0	4	law: 15, journal: report: 1,10,17,18	0	431
2/6/2017 10:09	Taylor Ricketts	71511	333:291	High Value and Long Life -- Double Jeopardy for Tunas and Billfishes	2011	Collette	33	32	39	6	0	1	NMFS at NOAA	6	0	0	Conservation	Agriculture, Food, and Renewable Resources (Section O)	Biological Sciences (Section G), Social, Economic, and Political Sciences (Section K)	Environment and Sustainability	Agriculture and Resources, Industry, Trade and Investment	Shallow	None	None	15	0	1	1	law: journal: 4, report: 14,	1	899
2/6/2017 10:23	Taylor Ricketts	71715	349:253	Data, privacy, and the greater good	2015	Horvitz	2	2	2	0	1	0	National Academy of Engineering, NSF	0	0	0	Policy Forum	Societal Impacts of Science and Engineering (Section X)	Information, Computing, and Communication (Section T), Social, Economic, and Political Sciences (Section K)	Science, Technology and Innovation	Public Finance and Social Policy, Policing and Justice Administration	Deep	Specific	General	28	5	1	8	law:10,11,15,18,28 journal: 12, policy: 13,17,21,23,24,25,26,27,	0	7
2/6/2017 11:01	Taylor Ricketts	71814	345:274	NIH Roadmap/Common Fund at 10 years	2014	Collins	3	3	3	0	0	3	NIH	0	0	0	Funding Transdisciplinary Research	Medical Sciences (Section N)	Information, Computing, and Communication (Section T), Societal Impacts of Science and Engineering (Section X)	Health	Science, Technology and Innovation	None	None	None	11	0	0	2	law: journal: report: 8,9	0	6
2/15/2017 17:18	Taylor Ricketts	72012	337:298	Getting HIV Treatment to the Most People	2012	Lynch	15	12	15	0	0	0	0	0	0	all part of doctors without borders	Public Health	Medical Sciences (Section N)	Biological Sciences (Section G), Social, Economic, and Political Sciences (Section K)	Health	International Development, Public Finance and Social Policy	Deep	General	Specific	25	0	0	2	law: journal: report: 2,20,	0	251
2/15/2017 17:26	Taylor Ricketts	72211	333:408	Redesigning Flood Insurance	2011	Michel-Kerjan	2	2	2	0	1	0	0	0	0	0	Disaster Management	Atmospheric and Hydrospheric Sciences (Section W)	Social, Economic, and Political Sciences (Section K)	Public Finance and Social Policy	Environment and Sustainability	Deep	Specific	Specific	25	0	1	7	Law: journal: 22, report: 9,12,15,17,19,23,26	1	369
2/15/2017 17:37	Taylor Ricketts	72415	349:384	Yellow lights for emerging technologies	2015	Charo	1	1	1	0	1	0	0	0	0	0	Science and Government	Industrial Science and Technology (Section P)	Agriculture, Food, and Renewable Resources (Section O), Pharmaceutical Sciences (Section S)	Science, Technology and Innovation	Health, Agriculture and Resources	Deep	Specific	Specific	19	1	0	8	law: 2, journal: report: 1,3,5,6,7,9,14,18,	0	0
2/15/2017 17:45	Taylor Ricketts	72514	345:376	Wildlife decline and social conflict	2014	Brashares	10	3	10	0	8	0	0	1	0	0	Conservation Policy	Biological Sciences (Section G)	Social, Economic, and Political Sciences (Section K)	Environment and Sustainability	Public Finance and Social Policy, Health	Shallow	None	None	12	1	0	2	law: 1, journal: report: 2,5,	0	127
2/15/2017 18:20	Taylor Ricketts	72613	341:349	Determining Benefi ts and Costs for Future Generations	2013	Arrow	13	16	20	6	3	1	NBER	5	0	0	Environmental Economics	Social, Economic, and Political Sciences (Section K)		Public Finance and Social Policy	Environment and Sustainability	Shallow	None	None	18	1	1	3	law:6, journal: 19, report: 2,5,18,	2	153
2/20/2017 11:54	Taylor Ricketts	72911	333:574	Population Policy in Transition in the Developing World	2011	Bongaarts	2	2	2	0	0	0	0	1	0	0	Population	Social, Economic, and Political Sciences (Section K)	Education (Section Q)	Health	Education	Shallow	None	None	32	0	2	7	law: journal: 6,15, report: 9,10,11,28,30,31,33	0	272
2/20/2017 12:04	Taylor Ricketts	80114	345:519	Global manufacturing and the future of technology	2014	Fuchs	1	1	1	0	1	0	0	0	0	0	Economics	Industrial Science and Technology (Section P)	Engineering (Section M)	Science, Technology and Innovation	Industry, Trade and Investment	Deep	Specific	General	19	0	1	3	law: journal: 18, report: 7,15,17,	0	17
2/20/2017 12:11	Taylor Ricketts	80213	341:460	Reforming China's S&T System	2013	Cao	4	6	6	2	2	0	0	0	0	0	Science and Government	General Interest in Science and Engineering (Section Y)		Science, Technology and Innovation	Public Finance and Social Policy	Deep	Specific	Specific	25	1	1	7	law: 5, journal: 11, report: 1,2,3, 12,14,24,27,	0	21
2/20/2017 12:19	Taylor Ricketts	80312	337:527	Aligning Regulations and Ethics in Human Research	2012	Dresser	1	1	1	0	1	0	0	0	0	0	Research Ethics	Social, Economic, and Political Sciences (Section K)	Medical Sciences (Section N)	Health		Deep	General	Specific	18	1	0	3	law: 1, journal: report: 2,12,13,	2	27
2/20/2017 12:28	Taylor Ricketts	80511	333:702	Changing Incentives to Publish	2011	Franzoni	3	6	6	2	1	1	NBER	0	0	0	Science Policy	Social, Economic, and Political Sciences (Section K)	General Interest in Science and Engineering (Section Y)	Science, Technology and Innovation		Shallow	None	None	12	0	0	1	law: journal: report: 8,	0	491
2/20/2017 12:44	Taylor Ricketts	80814	345:626	Regulating gene drives	2014	Oye	10	9	13	3	1	0	0	0	1	0	Biotechnology	Biological Sciences (Section G)	Agriculture, Food, and Renewable Resources (Section O), Chemistry (Section C)	Health	Environment and Sustainability, Agriculture and Resources	Deep	Specific	General	16	5	0	1	law: 9,11,12,13,14, journal: report: 10,	0	552
2/20/2017 13:18	Taylor Ricketts	80913	341:616	Who Will Pay for Public Access to Research Data?	2013	Berman	2	2	2	0	0	0	0	0	0	0	Science Priorities	General Interest in Science and Engineering (Section Y)		Science, Technology and Innovation		Deep	General	Specific	13	1	2	0	law: 1 journal: 10,11, report:	1	174
2/20/2017 13:25	Taylor Ricketts	81012	337:649	Water Sustainability for China and Beyond	2012	Liu	2	1	2	0	0	0	0	0	0	0	Water Management	Atmospheric and Hydrospheric Sciences (Section W)	Agriculture, Food, and Renewable Resources (Section O), Industrial Science and Technology (Section P)	Environment and Sustainability	Industry, Trade and Investment, Energy, Transport and Infrastructure	Deep	Specific	Specific	22	1	0	2	law:9, journal: report: 2,17,	0	533
2/20/2017 13:35	Taylor Ricketts	81514	3445:728	Technology's limited role in resolving debates over digital surveillance	2014	Lin	1	1	1	0	0	1	NRC	0	0	0	Information Technology	Information, Computing, and Communication (Section T)	Engineering (Section M)	Science, Technology and Innovation	Defence, Security and Foreign Relations	Deep	General	Specific	6	0	0	1	law: journal: report: 3,	0	0
2/20/2017 13:43	Taylor Ricketts	81613	341:717	Reevaluate Pesticides for Food Security and Safety	2013	Verger	2	2	2	0	0	1	WHO	0	0	0	Global Food Supply	Agriculture, Food, and Renewable Resources (Section O)	Chemistry (Section C), Medical Sciences (Section N)	Agriculture and Resources	Health, Environment and Sustainability	Deep	Specific	Specific	10	1	0	4	law: 4, journal: report: 1,5,9,10	0	46
2/20/2017 13:51	Taylor Ricketts	81712	337:802	Citizen Involvement in the U.S. Endangered Species Act	2012	Brosi	2	2	2	0	1	0	0	0	0	0	Conservation	Biological Sciences (Section G)		Environment and Sustainability		Deep	Specific	Specific	14	4	3	0	law:1,2,13,19 journal: 3,5,16 report:	7	30
2/20/2017 15:05	Taylor Ricketts	81911	333:940	Weaving a Richer Tapestry in Biomedical Science	2011	Tabak	2	2	2	0	0	2	NIH	0	0	0	Sociology	Social, Economic, and Political Sciences (Section K)	Medical Sciences (Section N)	Health	Employment, Labour and Immigration, Science, Technology and Innovation	Deep	Specific	Specific	12	0	0	2	law: journal: report: 10,14	0	176
2/20/2017 15:10	Taylor Ricketts	82115	349:792	Assessing the bioweapons threat	2015	Boddie	4	2	4	0	0	0	0	0	0	0	Biosecurity	Biological Sciences (Section G)	Societal Impacts of Science and Engineering (Section X)	Defence, Security and Foreign Relations	Science, Technology and Innovation	None	None	None	3	0	0	1	law: journal: report: 1,	0	1
2/20/2017 15:25	Taylor Ricketts	82214	345:873	Boosting GDP growth by accounting for the environment	2014	Muller	1	2	2	1	0	1	NBER	0	0	0	Economics	Social, Economic, and Political Sciences (Section K)		Macroeconomic Policy	Public Finance and Social Policy, Environment and Sustainability	Deep	General	Specific	13	1	1	5	law: 9, journal:12 report: 1,6,7,10,11	1	2
2/20/2017 15:35	Taylor Ricketts	82313	341:847	A Critical Crossroad for BLM's Wild Horse Program	2013	Garrott	2	2	2	0	0	0	0	0	0	0	Conservation	Biological Sciences (Section G)	Agriculture, Food, and Renewable Resources (Section O)	Environment and Sustainability	Agriculture and Resources	Deep	Specific	Specific	14	1	0	3	law: 2, journal: report: 7,9,10,	0	5
2/20/2017 15:42	Taylor Ricketts	82412	337:914	Water Security: Research Challenges and Opportunities	2012	Bakker	1	1	1	0	0	0	0	0	0	0	Water Management	Atmospheric and Hydrospheric Sciences (Section W)		International Development	Health, Environment and Sustainability	None	None	None	35	0	2	7	law: journal: 2,3, report: 5,6,11,15,18,22,29,	0	316
2/20/2017 15:46	Taylor Ricketts	82815	349:927	Safeguarding gene drive experiments in the laboratory	2015	Akbari	27	25	34	7	0	0	0	0	0	0	Biosafety	Biological Sciences (Section G)		Science, Technology and Innovation	Health, Agriculture and Resources	None	None	None	15	0	0	0	law: journal: report:	0	173
2/20/2017 15:54	Taylor Ricketts	82914	345:1006	Demystifying central government R&D spending in China	2014	Sun	2	2	3	1	0	0	0	0	0	0	Research Funding	General Interest in Science and Engineering (Section Y)		Science, Technology and Innovation	Public Finance and Social Policy	Deep	Specific	Specific	11	0	1	1	law: journal:11 report: 9,	0	5
2/20/2017 16:02	Taylor Ricketts	83013	341:962	Confronting the Sorry State of U.S. Health	2013	Bayer	4	4	4	0	0	0	0	0	0	0	Public Health	Social, Economic, and Political Sciences (Section K)	Medical Sciences (Section N)	Health		Deep	Specific	Specific	23	0	0	2	law: journal: report: 1, 8,	0	35
2/20/2017 17:22	Taylor Ricketts	83112	337:1043	Climate Negotiators Create an Opportunity for Scholars	2012	Aldy	2	2	6	2	2	2	NBER	2	0	0	Climate Change	Atmospheric and Hydrospheric Sciences (Section W)	Social, Economic, and Political Sciences (Section K)	Environment and Sustainability	Energy, Transport and Infrastructure, Defence, Security and Foreign Relations	Deep	Specific	Specific	10	2	1	4	law: 1,2, journal:9 report: 6,7,8,10	0	80
2/20/2017 17:29	Taylor Ricketts	90211	333:1254	Synthetic Biology: Regulating Industry Uses of New Biotechnologies	2011	Erickson	3	3	3	0	0	0	0	0	0	0	Policy Forum	Biological Sciences (Section G)	Chemistry (Section C)	Science, Technology and Innovation	Health	None	None	None	23	0	0	0	law: journal: report:	2	24
2/20/2017 17:44	Taylor Ricketts	90415	349:1048	Sustainable development agenda: 2030	2015	Colglazier	1	1	1	0	0	0	0	1	0	0	Sustainability	Agriculture, Food, and Renewable Resources (Section O)	Biological Sciences (Section G), Social, Economic, and Political Sciences (Section K)	International Development	Environment and Sustainability	Deep	Specific	Specific	9	1	0	5	law: UN declaration... journal: report: 1,2,3,4,6,9	0	1
2/20/2017 17:53	Taylor Ricketts	90514	345:1125	Applying scientific principles in international law on whaling	2014	de la Mare	3	2	3	0	0	2	Australian Antarctic Division	0	0	0	Science and Law	Agriculture, Food, and Renewable Resources (Section O)	Biological Sciences (Section G)	Agriculture and Resources	Science, Technology and Innovation, Defence, Security and Foreign Relations	Deep	Specific	Specific	11	5	0	0	law: 1,2,3,6,7 journal: report:	0	10
2/20/2017 17:59	Taylor Ricketts	90613	341:1067	Certify Sustainable Aquaculture?	2013	Bush	14	10	14	0	4	0	0	2	0	0	Global Food Supply	Agriculture, Food, and Renewable Resources (Section O)	Biological Sciences (Section G), Societal Impacts of Science and Engineering (Section X)	Agriculture and Resources	Environment and Sustainability, Industry, Trade and Investment	Shallow	None	None	16	0	3	1	law: journal: 4,5,16 report: 2,	0	83
2/20/2017 18:07	Taylor Ricketts	90712	337:1176	Rebuilding Public Trust in Science for Policy-Making	2012	Arimoto	2	2	3	1	1	2	Center for Research and Development Strategy in the Japan Science and Technology Agency (Japan)	0	0	0	Science and Society	General Interest in Science and Engineering (Section Y)		Science, Technology and Innovation		Shallow	None	None	14	3	0	6	law: 5,6,9, journal: report: 1,2,3,4,11,13	0	8
2/20/2017 18:22	Taylor Ricketts	90911	333:1384	Boosting Health Services Research	2011	Cook-Deegan	1	1	2	1	1	0	0	0	0	0	Public Health	Societal Impacts of Science and Engineering (Section X)	Medical Sciences (Section N)	Health	Public Finance and Social Policy	Deep	Specific	Specific	18	0	4	3	law: journal: 10,11,12,15, report: 5,6,16,	0	23
1/13/2017 11:35	Stephen Posner	91115	349: 1171	Winning coalitions for climate policy	2015	Meckling	4	6	10	4	10	0	0	0	0	0	Climate Change	Social, Economic, and Political Sciences (Section K)	Agriculture, Food, and Renewable Resources (Section O)	Environment and Sustainability	International Development, Agriculture and Resources, Energy, Transport and Infrastructure	Deep	General	Specific	17	0	6	5	--; 5, 8, 13, 14, 15, 16; 1, 7, 9, 11, 17	3	0
1/13/2017 12:34	Stephen Posner	91214	345: 1250	A global strategy for protecting vulnerable coastal populations	2014	Barbier	1	1	1	0	0	0	0	0	0	0	Disaster Management	Societal Impacts of Science and Engineering (Section X)	Agriculture, Food, and Renewable Resources (Section O), Biological Sciences (Section G)	Energy, Transport and Infrastructure	Cities, Urban and Regional Development, Environment and Sustainability, Defence, Security and Foreign Relations	Deep	Specific	Specific	14	1	0	1	12; --; 13	0	34
1/13/2017 12:22	Stephen Posner	91313	341: 1178	DNA Identification After Conflict or Disaster	2013	London	3	3	3	0	2	0	0	0	0	0	Public Health	Medical Sciences (Section N)	Biological Sciences (Section G)	Policing and Justice Administration	Health	Shallow	None	None	15	0	1	1	--; 14; 5	0	3
1/13/2017 12:56	Stephen Posner	91412	337: 1297	Federal Laboratory-Business Commercialization Partnerships	2012	Walejko	4	4	4	0	0	0	0	0	4	STPI	Science and Industry	Industrial Science and Technology (Section P)	Societal Impacts of Science and Engineering (Section X)	Science, Technology and Innovation	Industry, Trade and Investment	Deep	General	Specific	34	8	1	3	2, 5, 7, 13, 16, (17), 18, 19, 20 ; 10 ; 25, 26, 28	0	NA
1/13/2017 12:42	Stephen Posner	91611	333: 1580	Preventing the Next Fukushima	2011	Bunn	2	2	2	0	2	0	0	0	0	0	Nuclear Safety	Agriculture, Food, and Renewable Resources (Section O)	Industrial Science and Technology (Section P), Societal Impacts of Science and Engineering (Section X)	Energy, Transport and Infrastructure	Environment and Sustainability, Agriculture and Resources	Deep	Specific	Specific	10	0	0	2	-- ; -- ; 2, 8	1	74
1/16/2017 11:07	Stephen Posner	91815	349: 1280	Reform forest fire management	2015	North	7	6	9	2	0	2	USFS	1	0	0	Environmental Science	Agriculture, Food, and Renewable Resources (Section O)	Biological Sciences (Section G)	Agriculture and Resources	Environment and Sustainability	Deep	Specific	Specific	16	0	0	3	-- ; -- ; 5, 6, 11	0	18
1/13/2017 13:06	Stephen Posner	91914	345: 1457	Pursuit of the common good	2014	Dasgupta	2	3	3	1	1	0	0	0	0	0	Environment and Development	Agriculture, Food, and Renewable Resources (Section O)	Social, Economic, and Political Sciences (Section K)	Environment and Sustainability	International Development, Agriculture and Resources, Energy, Transport and Infrastructure	Shallow	None	None	17	0	0	1	--; --; 10	1	26
1/13/2017 13:14	Stephen Posner	92013	341: 1345	Mitochondrial Replacement, Evolution, and the Clinic	2013	Reinhardt	3	4	4	1	0	0	0	0	0	0	Medicine	Medical Sciences (Section N)	Biological Sciences (Section G)	Health		Shallow	None	None	15	0	0	0	--; --; --	1	433
1/16/2017 10:51	Stephen Posner	92112	337: 1456	Global Indicators and Targets for Noncommunicable Diseases	2012	Angell	3	3	3	0	0	3	CDC	0	0	0	Global Health	Medical Sciences (Section N)		Health	International Development	Shallow	None	None	10	0	0	4	-- ; -- ; 1, 6, 8, 9	0	66
1/16/2017 11:21	Stephen Posner	92415	349: 1446	Female genital cutting is not a social coordination norm	2015	Efferson	5	2	5	0	0	0	0	0	0	0	Behavior	Social, Economic, and Political Sciences (Section K)	Medical Sciences (Section N)	Health	International Development	Shallow	None	None	13	0	0	2	-- ; -- ; 6, 14	0	NA
1/19/2017 9:01	Stephen Posner	92614	345: 1562	Implementing Pasteur's vision for rabies elimination	2014	Lankester	6	4	10	3	0	0	0	0	0	0	Infectious Disease	Medical Sciences (Section N)		Health	International Development	Shallow	None	None	18	0	0	0	--	0	11
1/16/2017 11:35	Stephen Posner	93011	333: 1828	Rescuing Wolves from Politics: Wildlife as a Public Trust Resource	2011	Bruskotter	3	3	3	0	0	0	0	0	0	0	Science and Law	Agriculture, Food, and Renewable Resources (Section O)	Biological Sciences (Section G)	Environment and Sustainability	Agriculture and Resources, Policing and Justice Administration	Deep	General	Specific	23	5	7	0	15, 17, 20, 23, 25 ; 12, 13, 16, 18, 19, 21, 22 ; --	2	86
1/19/2017 8:53	Stephen Posner	100215	14.60694444	The IPCC at a crossroads: Opportunities for reform	2015	Carraro	6	8	10	3	4	0	0	0	3	0	Climate Change	Atmospheric and Hydrospheric Sciences (Section W)		Environment and Sustainability		Deep	Specific	Specific	9	0	4	0	--; 4, 5, 6, 9; --	0	16
1/19/2017 9:13	Stephen Posner	100314	14.44583333	Progress in measuring subjective well-being	2014	Krueger	2	3	3	1	1	1	NBER	0	0	0	Psychology and Economics	Psychology (Section J)	Social, Economic, and Political Sciences (Section K)	Health	Policy evaluation	Shallow	None	None	17	0	0	1	--; --; 13	0	12
1/19/2017 9:36	Stephen Posner	100413	14.30555556	Scholarly Communication: Cultural Contexts, Evolving Models	2013	Harley	1	1	1	1	0	0	0	0	0	0	Communication in Science	Education (Section Q)		Education		None	None	None	22	0	0	0	--	0	2
1/19/2017 9:45	Stephen Posner	100512	14.11597222	Deploying Off-Grid Technology to Eradicate Energy Poverty	2012	Sovacool	1	1	1	1	1	0	0	0	0	0	Energy	Agriculture, Food, and Renewable Resources (Section O)	Social, Economic, and Political Sciences (Section K)	Energy, Transport and Infrastructure	Environment and Sustainability	Shallow	None	None	23	0	6	1	-- ; 13, 14, 15, 18, 22, 23 ; 6	0	78
1/19/2017 9:52	Stephen Posner	100711	13.94583333	Paleolithic Art in Peril: Policy and Science Collide at Altamira Cave	2011	Saiz-Jimenez	8	3	8	0	0	5	spanish national research council	0	0	0	Conservation	Biological Sciences (Section G)		Arts and Culture	Environment and Sustainability	Deep	Specific	Specific	15	0	0	2	-- ; -- ; 7, 14	0	207
1/29/2017 6:14	Stephen Posner	100915	350: 165	Designing a sustainable diet	2015	Merrigan	6	3	6	0	4	0	0	0	0	0	Food Science	Agriculture, Food, and Renewable Resources (Section O)		Agriculture and Resources	Health	Deep	General	Specific	11	2	0	3	10, 11 ; -- ; 1, 2, 4	0	3
1/29/2017 6:22	Stephen Posner	101014	346: 171	Amplify scientific discovery with artificial intelligence	2014	Gil	4	4	4	0	0	0	0	0	0	0	Artificial Intelligence	Information, Computing, and Communication (Section T)	Societal Impacts of Science and Engineering (Section X)	Science, Technology and Innovation		None	None	None	13	0	0	0	-- ; -- ; --	0	29
1/29/2017 6:34	Stephen Posner	101113	342: 197	Newborn Screening: Gaps in the Evidence	2013	Wilcken	1	2	2	1	0	0	0	0	0	0	Medicine	Medical Sciences (Section N)		Health		Shallow	None	None	19	0	0	2	-- ; -- ; 5, 14	0	17
1/29/2017 7:15	Stephen Posner	101212	338: 196	Standards and Infrastructure for Innovation Data Exchange	2012	Haak	7	8	8	1	2	1	NBER	0	0	0	Information Science	Information, Computing, and Communication (Section T)		Science, Technology and Innovation		Deep	Specific	Specific	7	2	0	0	1, 7; -- ; --	0	12
1/29/2017 7:22	Stephen Posner	101411	334: 180	A Major Environmental Cause of Death	2011	Martin	4	4	4	0	0	4	NIH	0	0	0	Public Health	Medical Sciences (Section N)	Agriculture, Food, and Renewable Resources (Section O)	Health	International Development, Environment and Sustainability	Shallow	None	None	12	0	0	0	--	1	752
2/2/2017 7:29	Stephen Posner	101714	346: 296	Changes on the horizon for consumer genomics in the EU	2014	Kalokairinou	3	2	3	0	0	0	0	0	0	0	Science and Regulation	Medical Sciences (Section N)	Pharmaceutical Sciences (Section S)	Health		Deep	Specific	General	13	4	0	4	1, 3, 4, 6, ; -- ; 9, 10, 11, 13	0	6
1/30/2017 6:11	Stephen Posner	101813	342: 314	Probiotics: Finding the Right Regulatory Balance	2013	Hoffmann	7	3	7	0	4	0	0	0	0	0	Science and Regulation	Medical Sciences (Section N)	Pharmaceutical Sciences (Section S)	Health		Deep	Specific	Specific	15	1	0	2	14 ; -- ; 7, 11	2	369
1/29/2017 7:32	Stephen Posner	101912	338: 331	Toward Variable Funding for International Science	2012	Edler	1	1	1	0	0	0	0	0	0	0	Research Funding	General Interest in Science and Engineering (Section Y)		Science, Technology and Innovation		Shallow	None	None	16	0	1	1	-- ; 2 ; 12	0	3
1/30/2017 6:19	Stephen Posner	102315	350: 382	Making waves: The science and politics of ocean protection	2015	Lubchenco	2	1	2	0	0	0	0	0	0	0	Oceans	Atmospheric and Hydrospheric Sciences (Section W)	Agriculture, Food, and Renewable Resources (Section O)	Environment and Sustainability		Shallow	None	None	15	0	0	0	--	1	15
1/30/2017 6:26	Stephen Posner	102414	346: 429	Coping with the curse of freshwater variability	2014	Hall	7	5	7	0	1	1	UK environment agency	0	1	World Bank	Water Security	Atmospheric and Hydrospheric Sciences (Section W)	Agriculture, Food, and Renewable Resources (Section O), Social, Economic, and Political Sciences (Section K)	Agriculture and Resources	Environment and Sustainability, Energy, Transport and Infrastructure	Shallow	None	None	14	0	0	0	-- ; -- ; 3	0	15
2/2/2017 7:37	Stephen Posner	102513	342: 425	Biodiversity Risks from Fossil Fuel Extraction	2013	Butt	9	3	10	0	0	0	0	0	0	0	Conservation	Agriculture, Food, and Renewable Resources (Section O)	Biological Sciences (Section G)	Energy, Transport and Infrastructure	Environment and Sustainability, Agriculture and Resources	Shallow	None	None	17	0	0	0	--	0	60
2/2/2017 20:44	Stephen Posner	102612	338: 472	Social Media and the Elections	2012	Metaxas	2	1	2	0	0	0	0	0	0	0	Science and Society	Information, Computing, and Communication (Section T)	Social, Economic, and Political Sciences (Section K)	Science, Technology and Innovation		None	None	None	24	0	0	0	--	0	50
2/2/2017 8:45	Stephen Posner	102811	334: 456	Preparing for Resettlement Associated with Climate Change	2011	Sherbinin	19	17	19	0	1	1	French agency of development,	1	1	IDDRI	Climate Change	Social, Economic, and Political Sciences (Section K)		Employment, Labour and Immigration	International Development, Environment and Sustainability	Shallow	None	None	25	0	0	5	-- ; -- ; 8, 10, 13, 14, 15	1	548
2/2/2017 7:43	Stephen Posner	103015	350: 507	A unified initiative to harness Earth's microbiomes	2015	Alivisatos	18	21	23	3	0	0	0	0	0	0	Microbiome	Biological Sciences (Section G)	Medical Sciences (Section N)	Science, Technology and Innovation	Health	None	None	None	14	0	0	0	--	0	63
2/2/2017 9:07	Stephen Posner	103114	346: 547	Adolescent mental health -- Opportunity and obligation	2014	Lee	7	8	9	2	0	0	0	0	0	0	Mental Health	Psychology (Section J)	Medical Sciences (Section N), Neuroscience (Section V)	Health		None	None	None	18	0	0	0	--	0	116
2/2/2017 8:54	Stephen Posner	110113	342: 562	Doctoral Students and U.S. Immigration Policy	2013	Maskus	3	3	3	0	2	0	0	0	0	0	Economics	Social, Economic, and Political Sciences (Section K)		Employment, Labour and Immigration	Education	Deep	General	Specific	28	2	2	1	24, 25 ; 19, 21 ; 3	0	0
2/2/2017 20:54	Stephen Posner	110212	338: 610	Obama and the Promotion of International Science	2012	Bollyky	2	2	2	0	0	0	0	1	0	0	Science and Government	General Interest in Science and Engineering (Section Y)		Science, Technology and Innovation		Shallow	None	None	24	0	0	3	-- ; -- ; 3, 16, 22	0	0
2/2/2017 21:02	Stephen Posner	110411	334: 603	Paying for Ecosystem Services: Promise and Peril	2011	Kinzig	7	6	7	0	0	0	0	0	0	0	Sustainability	Social, Economic, and Political Sciences (Section K)	Agriculture, Food, and Renewable Resources (Section O), Biological Sciences (Section G)	Environment and Sustainability	International Development, Agriculture and Resources	Shallow	None	None	36	1	1	1	13 ; 3 ; 32	1	2779
2/6/2017 9:37	Stephen Posner	110615	350: 632	Evidence gaps and ethical review of multicenter studies	2015	Ervin	4	2	5	1	0	0	0	0	0	0	Research Ethics	Medical Sciences (Section N)	Biological Sciences (Section G), Pharmaceutical Sciences (Section S)	Health	Science, Technology and Innovation	Deep	Specific	Specific	15	4	0	2	3, 5, 6, 7 ; -- ; 4, 11	0	3
2/4/2017 9:35	Stephen Posner	110714	346: 706	Brazil's environmental leadership at risk	2014	Ferreira	16	16	16	0	0	0	0	1	0	0	Environment and Development	Biological Sciences (Section G)	Agriculture, Food, and Renewable Resources (Section O)	Environment and Sustainability	International Development, Agriculture and Resources	Deep	General	Specific	14	2	1	0	5, 6 ; 11 ; --	0	95
2/4/2017 9:27	Stephen Posner	110813	342: 696	Hell and High Water: Practice- Relevant Adaptation Science	2013	Moss	27	24	27	0	0	5	USACE, NOAA, USAID, SF public utilities commission	0	0	0	Climate Change	Atmospheric and Hydrospheric Sciences (Section W)	Social, Economic, and Political Sciences (Section K)	Environment and Sustainability	Cities, Urban and Regional Development, Energy, Transport and Infrastructure	Deep	General	Specific	30	0	0	3	-- ; -- ; 12, 26, 30	0	290
2/6/2017 9:47	Stephen Posner	110912	338: 745	Law and Science Collide Over Human Gene Patents	2012	Cook-Degan	1	1	1	0	1	0	0	0	0	0	Patent Law	Biological Sciences (Section G)	Medical Sciences (Section N), Pharmaceutical Sciences (Section S)	Science, Technology and Innovation	Health, Industry, Trade and Investment	Deep	Specific	General	21	8	2	1	1, 2, 7, 8, 13, 14, 17, 23 ; 4, 11 ; 22	0	92
2/7/2017 6:13	Stephen Posner	111315	350:743	Stakeholders in climate science: Beyond lip service?	2015	Klenk	6	6	6	0	1	0	0	0	0	0	Global Change Science	Societal Impacts of Science and Engineering (Section X)	Atmospheric and Hydrospheric Sciences (Section W), Social, Economic, and Political Sciences (Section K)	Environment and Sustainability	Science, Technology and Innovation, Energy, Transport and Infrastructure	Shallow	None	None	10	0	3	0	-- ; 2, 4, 5 ; --	0	NA
2/6/2017 9:55	Stephen Posner	111414	346: 815	An economic perspective on the EPA's Clean Power Plan	2014	Fowlie	13	7	13	0	8	1	NBER	0	0	0	Environmental Economics	Social, Economic, and Political Sciences (Section K)	Atmospheric and Hydrospheric Sciences (Section W)	Environment and Sustainability	Energy, Transport and Infrastructure	Deep	Specific	Specific	4	1	1	0	1 ; 2 ; --	2	21
2/9/2017 18:25	Stephen Posner	111513	342: 803	Protected Areas and Effective Biodiversity Conservation	2013	Saout	11	8	18	4	0	4	UNEP	8	0	0	Conservation	Biological Sciences (Section G)		Environment and Sustainability		Deep	Specific	Specific	19	0	0	1	- ; - ; 3	0	NA
2/7/2017 6:26	Stephen Posner	111612	338: 887	The Green Economy Post Rio+20	2012	Barbier	1	1	1	0	0	0	0	0	0	0	Sustainability	Social, Economic, and Political Sciences (Section K)	Agriculture, Food, and Renewable Resources (Section O)	Environment and Sustainability	International Development, Agriculture and Resources	Deep	Specific	Specific	17	0	0	9	-- ; -- ; 2, 3, 5, 6, 8, 12, 14, 15, 16	1	82
2/9/2017 18:19	Stephen Posner	111811	334: 908	Preparing to Manage Climate Change Financing	2011	Donner	3	3	4	1	0	0	0	0	0	0	Environment and Development	Social, Economic, and Political Sciences (Section K)	Agriculture, Food, and Renewable Resources (Section O)	Environment and Sustainability	International Development, Agriculture and Resources	Deep	Specific	General	18	0	1	2	-- ; 18 ; 8, 13	0	152
2/9/2017 18:11	Stephen Posner	112015	350: 911	Transport: A roadblock to climate change mitigation?	2015	Creutzig	7	7	11	4	1	0	PBL	0	0	0	Energy and Environment	Social, Economic, and Political Sciences (Section K)	Agriculture, Food, and Renewable Resources (Section O), Engineering (Section M)	Energy, Transport and Infrastructure	Environment and Sustainability	Shallow	None	None	14	0	3	0	- ; 4, 9, 10 ; --	0	7
2/12/2017 8:05	Stephen Posner	112114	346: 912	Rethinking China's new great wall	2014	Ma	9	8	12	2	0	0	0	1	0	0	Ecosystems Management	Biological Sciences (Section G)	Agriculture, Food, and Renewable Resources (Section O)	Environment and Sustainability	Cities, Urban and Regional Development, Agriculture and Resources	Shallow	None	None	13	1	0	2	12; --; 10, 11	0	104
2/9/2017 20:29	Stephen Posner	112312	338: 1031	The Contribution of Private Industry to Agricultural Innovation	2012	Fuglie	5	3	5	0	0	4	USDA	0	0	0	Research Funding	Agriculture, Food, and Renewable Resources (Section O)	Industrial Science and Technology (Section P), Societal Impacts of Science and Engineering (Section X)	Agriculture and Resources	Science, Technology and Innovation	Shallow	None	None	21	1	0	1	14; -- ; 24	0	47
2/9/2017 20:22	Stephen Posner	112511	334: 1066	The New Framework for EU Research and Innovation	2011	Horvat	1	1	1	0	0	0	0	0	0	0	Science in Europe	Societal Impacts of Science and Engineering (Section X)		Science, Technology and Innovation		Deep	Specific	Specific	42	3	0	8	6, 11, 53 ; - ; 1, 2, 5, 12, 14, 25, 26, 50	0	5
2/12/2017 8:42	Stephen Posner	112715	350: 1034	Understanding China's non-fossil energy targets	2015	Lewis	5	3	7	2	1	0	0	0	0	0	Energy and Environment	Agriculture, Food, and Renewable Resources (Section O)		Environment and Sustainability	Energy, Transport and Infrastructure	Deep	General	Specific	16	1	0	4	11 ; -- ; 10, 12, 14, 15	0	0
2/12/2017 8:57	Stephen Posner	112814	346: 1061	Universal education is key to enhanced climate adaptation	2014	Lutz	3	1	3	0	0	0	0	0	0	0	Environment and Development	Social, Economic, and Political Sciences (Section K)	Education (Section Q)	International Development	Education, Environment and Sustainability	Shallow	None	None	15	0	0	0	--	0	97
2/12/2017 8:50	Stephen Posner	112913	342: 1049	International Cooperation on Human Lunar Heritage	2013	Hertzfeld	2	1	2	0	2	0	0	0	0	0	Space Law	Astronomy (Section D)		Defence, Security and Foreign Relations	Agriculture and Resources	Deep	Specific	Specific	7	6	0	1	1, 3, 4, 6, 7, 8 ; -- ; 2	0	0
2/12/2017 8:33	Stephen Posner	113012	338: 1153	From Acid Rain to Climate Change	2012	Reis	13	9	13	0	0	7	CEH (UK), DEFRA (UK), RIVM (Netherlands), Federal Ministry for the Environment, Nature Conservation, Building and Nuclear Safety (Germany)	0	0	0	Atmospheric Science	Atmospheric and Hydrospheric Sciences (Section W)		Environment and Sustainability		Deep	Specific	General	16	2	0	3	6, 11 ; -- ; 4, 5, 12	0	321
2/12/2017 9:04	Stephen Posner	120211	334: 1210	Better Data for a Better Internet	2011	Palfrey	2	1	2	0	2	0	0	0	0	0	Information Science	Information, Computing, and Communication (Section T)		Science, Technology and Innovation		Shallow	None	None	9	0	0	2	-- ; -- ; 4, 6	0	17
2/12/2017 20:01	Stephen Posner	120415	350: 1168	Can Paris pledges avert severe climate change?	2015	Fawcett	15	4	15	0	1	5	EPA, Dept State	0	0	0	Climate Policy	Atmospheric and Hydrospheric Sciences (Section W)		Environment and Sustainability	Energy, Transport and Infrastructure	Shallow	None	None	15	1	0	2	1 ; -- ; 2, 3	0	29
2/12/2017 9:54	Stephen Posner	120514	346: 1189	Using and improving the social cost of carbon	2014	Pizer	13	10	18	5	8	0	0	6	0	0	Environmental Economics	Social, Economic, and Political Sciences (Section K)		Environment and Sustainability	Energy, Transport and Infrastructure	Deep	Specific	Specific	13	4	0	1	2, 3, 7, 10 ; -- ; 1	2	22
2/12/2017 12:25	Stephen Posner	120613	342: 1173	Advanced Manufacturing Policies and Paradigms for Innovation	2013	Bonvillian	1	1	1	0	1	0	0	0	0	0	Technology	Industrial Science and Technology (Section P)	Societal Impacts of Science and Engineering (Section X)	Science, Technology and Innovation	Employment, Labour and Immigration, Industry, Trade and Investment	Shallow	None	None	31	1	1	5	6 ; 10 ; 4, 7, 19, 27, 28	0	0
2/12/2017 10:01	Stephen Posner	120712	338: 1296	U.S. Regulation of Stem Cells as Medical Products	2012	Sipp	2	4	4	1	0	0	0	0	0	0	Stem Cells	Medical Sciences (Section N)	Biological Sciences (Section G), Pharmaceutical Sciences (Section S)	Health	Science, Technology and Innovation	Deep	Specific	Specific	22	2	1	1	1, 2 ; 21 ; 15	1	172
2/12/2017 10:07	Stephen Posner	120911	334: 1351	Entertainment Value: Should the Media Pay for Nature Conservation?	2011	Jepson	4	3	4	0	0	0	0	1	0	0	Environmental Economics	Social, Economic, and Political Sciences (Section K)		Environment and Sustainability	Arts and Culture	Deep	General	Specific	14	0	0	1	-- ; -- ; 12	0	31
2/12/2017 19:50	Stephen Posner	121214	346: 1296	One Health approach to use of veterinary pharmaceuticals	2014	Margalida	18	21	22	4	0	2	FAO, Spanish research council	5	0	C. G. R. Bowden, X. Manteca, T. Kuiken, R. E. Green, and V. Naidoo were hard to find. Several of the authors' background were showing up in Spanish. Also their affiliations were not included in the footnotes of the article. The authors I did find were all scientists (focused in zoology)	Science and Regulation	Biological Sciences (Section G)	Medical Sciences (Section N)	Environment and Sustainability	Health	Deep	General	Specific	24	0	0	0	--	0	20
2/12/2017 12:32	Stephen Posner	121313	342: 1321	The Bioethics Commission on Incidental Findings	2013	Gutmann	1	1	1	0	1	0	0	0	0	0	Ethics	Medical Sciences (Section N)	Biological Sciences (Section G)	Health		Shallow	None	None	6	0	0	1	-- ; -- ; 3	0	29
2/12/2017 12:38	Stephen Posner	121412	338: 1424	The Greening of Insurance	2012	Mills	1	1	1	0	0	0	0	0	0	0	Climate Change	Social, Economic, and Political Sciences (Section K)	Atmospheric and Hydrospheric Sciences (Section W)	Public Finance and Social Policy	Environment and Sustainability, Industry, Trade and Investment	Shallow	None	None	19	0	2	0	-- ; 17, 18 ; --	0	63
2/12/2017 19:08	Stephen Posner	121815	350: 1471	A more systematic approach to biological risk	2015	Palmer	3	5	7	2	1	0	0	0	0	0	Science Governance	Biological Sciences (Section G)	Medical Sciences (Section N)	Health	Defence, Security and Foreign Relations	Deep	Specific	Specific	17	3	0	2	1, 2, 10 ; -- ; 5, 15	0	6
2/12/2017 19:36	Stephen Posner	121914	346: 1452	Fixing problems with cell lines	2014	Lorsch	3	4	4	1	0	3	NIH	0	0	0	Cell Biology	Biological Sciences (Section G)		Health	Science, Technology and Innovation	Shallow	None	None	14	0	0	1	-- ; -- ; 10, 12	0	168
2/12/2017 19:41	Stephen Posner	122311	334: 1645	ARVs as HIV Prevention: A Tough Road to Wide Impact	2011	Shelton	1	1	1	0	0	1	USAID's Bureau for Global Health	0	0	0	HIV / AIDS	Medical Sciences (Section N)	Biological Sciences (Section G)	Health	International Development	None	None	None	33	0	0	0	--	0	624
2/2/2017 10:59	Taylor Ricketts	627145	344:1455	Harnessing DNA to improve environmental management	2014	Kelly	11	3	12	1	2	0	0	0	0	0	Environmental Monitoring	Biological Sciences (Section G)		Environment and Sustainability	Science, Technology and Innovation	None	None	None	14	0	0	0		1	200
9/7/2016 9:47	synthesis	20714A	343:1080	Why Should We Care About Temporary Waterways?	2014	Acuna	10	11	15	0	0	1	IRSTEA France	0	0	0	Conservation	Biological Sciences (Section G)	Atmospheric and Hydrospheric Sciences (Section W)	Environment and Sustainability		Deep	General	Specific	23	3	1	2	1, 19, 20; 3; 12, 24	0	195
9/7/2016 9:35	synthesis	20714B	343:615	Scientific Diversity Interventions	2014	Moss-Racusin	6	3	6	0	0	0	0	0	0	former OSTP	Social Science	Social, Economic, and Political Sciences (Section K)	Education (Section Q)	Science, Technology and Innovation	Education	Deep	Specific	Specific	18	0	0	1	0; 0; 14	0	96
